# Supplementary material
Source: PubMed Central journal article supplement (PMC10680149)
Supplement: NIHMS1933987-supplement-1.pdf [file NIHMS1933987-supplement-1.pdf]

## **Conclusions**

We have developed two thaw methods for archival PBMCs, either using the proprietary MarrowMax™ medium or an RPMI based media with high FBS content. Statistical analysis showed that both methods were comparable, but with a possible preference for MarrowMax™. We demonstrated that these thawed cells were able to undergo DNA repair in a manner comparable to freshly drawn WB. To our knowledge, this is the first phenotypic assay of DNA repair functionality in cryopreserved PBMCs and represents a significant step forward for high impact, large-scale, demographic studies using cohorts such as the BCFR. Future work: This thawing protocol can be applied for any metabolic phenotypic assay using multi-color panels including  $\gamma$ -H2AX and a nuclear stain, as the image stream platform can accommodate 4-9 fluorescent channels. This assay technique and validated machine learning classifiers was developed to be scaled up in a large (>400) paired case-control cohort of breast cancer patients. Using this larger cohort, proper model testing could be done to further validate these machine learning classifiers and determine if the differences between apoptotic events (as classified by the edge staining and pan-nuclear staining) are significantly different at different time points or radiation doses. Ultimately, this cohort will be used to test for a correlation between DRC and breast cancer risk.

## **Supplemental Figures**

Supplemental Table 1. Epidemiological data for cryogenically preserved PBMCs used in this study

| Donor# | Donation Date | Age at Interview | BMI  | Race/Ethnicity | Smoking Status |
|--------|---------------|------------------|------|----------------|----------------|
| 1      | 6/1/1998      | 43               | 24.9 | Other          | Non-Smoker     |
| 2      | 8/13/1999     | 36               | 20.5 | Other          | Non-Smoker     |
| 3      | 8/24/1999     | 47               | 30.1 | Other          | Smoker         |
| 4      | 9/15/1999     | 33               | 25.8 | White          | Smoker         |
| 5      | 9/23/1999     | 45               | 23.9 | White          | Non-Smoker     |
| 6      | 9/28/1999     | 42               | 29.2 | White          | Non-Smoker     |
| 7      | 3/13/2001     | 47               | 23.2 | White          | Non-Smoker     |
| 8      | 12/29/1999    | 42               | 27.3 | Other          | Non-Smoker     |
| 9      | 10/3/2001     | 67               | 28.3 | White          | Non-Smoker     |
| 10     | 10/5/2001     | 57               | 24.2 | Hispanic       | Non-Smoker     |
| 11     | 10/13/1999    | 44               | 23.2 | Other          | Non-Smoker     |
| 12     | 5/26/1999     | 45               | 19.5 | Other          | Smoker         |
| 13     | 7/29/1999     | 67               | 23.5 | Other          | Non-Smoker     |
| 14     | 5/22/1999     | 50               | 20.0 | Other          | Non-Smoker     |
| 15     | 7/27/2001     | 70               | 28.8 | White          | Non-Smoker     |
| 15     | 4/22/1999     | 43               | 28.9 | Other          | Non-Smoker     |
| 16     | 7/22/1999     | 47               | 18.7 | Other          | Smoker         |
| 17     | 10/4/1999     | 41               | 23.0 | Other          | Non-Smoker     |
| 18     | 8/19/1999     | 47               | 29.8 | Other          | Non-Smoker     |
| 19     | 12/29/1999    | 68               | 25.0 | Other          | Smoker         |

Supplemental Table 2. Net  $\gamma$ -H2AX fluorescence in PBMCs from 19 donors at serial time points (1-20h). Fluorescence values (arbitrary units) of cells after gating strategies discussed above

| Time (hr) | MarrowMax™ Media |          |          |          |          | RPMI+30%FBS Media |          |          |          |          |
|-----------|------------------|----------|----------|----------|----------|-------------------|----------|----------|----------|----------|
|           | 1                | 2        | 3        | 5        | 20       | 1                 | 2        | 3        | 5        | 20       |
| Donor1    | 6459.135         | 9815.262 | 8964.727 | NA       | NA       | 959.7186          | 9955.634 | 8334.906 | 2746.41  | 541.4851 |
| Donor2    | 7633.71          | 8473.178 | 8269.042 | 4955.196 | 495.9535 | 7643.71           | 7415.421 | 6619.759 | 4321.696 | 549.5778 |
| Donor3    | 10250.88         | 11505.1  | 7978.822 | 4564.568 | 3614.442 | 9504.126          | 8270.196 | 7159.567 | 284.3621 | 397.9783 |
| Donor4    | 14985.01         | 24126.95 | 10838.2  | 7101.092 | 253.7828 | 14144.12          | 24890.76 | 11744.34 | 7561.72  | 624.2804 |
| Donor5    | 8839.927         | 6982.514 | 6117.49  | 3744.181 | 662.1821 | 8571.471          | 8702.745 | 6117.562 | 4011.613 | 516.3899 |
| Donor6    | 8702.637         | 8866.777 | 7496.387 | 4718.03  | 494.7579 | 6448.448          | 6916.897 | 6286.755 | 4793.491 | 452.4978 |
| Donor7    | 11541.68         | 12553.16 | 7931.49  | 5178.438 | 332.9373 | 13262.16          | 16795.59 | NA       | 4831.572 | 517.1593 |
| Donor8    | 6276.689         | 7289.746 | 5420.853 | 4770.318 | 694.3109 | 7001.545          | 7034.871 | 6021.267 | 4268.24  | 335.7537 |
| Donor9    | 8123.593         | 8191.799 | 6279.553 | 4356.481 | 744.3651 | 7699.171          | 8809.242 | 6062.908 | 4863.975 | 1062.907 |
| Donor10   | 11036.64         | 10235.38 | 7345.67  | 5831.504 | -5.745   | 7371.352          | 6886.124 | 6250.757 | 4765.495 | -186.018 |
| Donor11   | 12619.21         | 11486.91 | 11079.31 | 5733.749 | -54.4218 | 12626.07          | 11379.06 | 9230.248 | 5580.505 | 326.1971 |
| Donor12   | 5627.747         | 9271.087 | 8060.925 | 5152.029 | 691.0786 | 7159.91           | 8403.8   | 7372.732 | 8222.152 | 1015.145 |
| Donor13   | 15941.46         | 14861.38 | 15514.96 | 6700.826 | 984.279  | 20057.12          | 14252.48 | 17387.22 | 5401.886 | 1140.13  |
| Donor14   | 9402.057         | 10383.07 | 8534.563 | 5414.031 | 1379.748 | 8133.236          | 9634.949 | 8981.046 | 5012.221 | 388.2656 |
| Donor15   | 13037.85         | 13325.02 | 14672.38 | 10006.83 | 1152.478 | 15969.75          | 10873.53 | 13849.75 | 9839.599 | 878.159  |
| Donor16   | 16677.52         | 20177.42 | 17241.21 | 6915.947 | 936.5819 | 12622.53          | 21752.81 | 14958.36 | 7797.924 | 813.1492 |
| Donor17   | 11856.67         | 15213.4  | 12889    | 7475.517 | 653.3858 | 6693.838          | 11340.5  | 12044.23 | 6289.701 | 629.1842 |
| Donor18   | 5072.061         | 6800.426 | 11458.13 | 9350.713 | 740.2701 | NA                | NA       | NA       | NA       | NA       |
| Donor19   | 7632.862         | 6743.039 | 7843.518 | 5208.459 | 938.7754 | 7985.202          | 7955.929 | 7451.11  | 7026.967 | 2799.032 |

are based on median fluorescence intensity of each irradiated time point after subtracting its appropriate un-irradiated control. Missing values (“NA”) indicate insufficient number of cells (<100 cells).

### Conflict of Interest

The authors have no conflict of interest to declare.

### Data availability

The data types associated with ImageStream data acquisition are Raw image file (.rif), compensated image file (.cif), and data analysis file (.daf) and require the IDEAS software for analysis. Data from these experiments are available upon request.

### Acknowledgements

The authors would like to thank Ms. Melissa White for recruitment and coordinating blood draws for fresh whole blood donors. The Biomarkers Laboratory that stores BCFR samples is supported by P30ES009089 and P30CA013696. Helen Turner was supported by awards from the National Institute of Allergy and Infectious Diseases [U01 AI148309]. This work was supported by awards from the National Cancer Institute [R01 CA159868, UM1 CA164920, and

P30 CA013696] and the National Institute of Environmental Health Sciences [P30 ES009089 and U01 ES029660] and the Breast Cancer Research Foundation. The content is solely the responsibility of the authors and does not necessarily represent the official views of the NIH.

## References

1. Kennedy, D.O., et al., *DNA repair capacity of lymphoblastoid cell lines from sisters discordant for breast cancer*. J Natl Cancer Inst, 2005. **97**(2): p. 127-32.
2. Machella, N., et al., *Double-strand breaks repair in lymphoblastoid cell lines from sisters discordant for breast cancer from the New York site of the BCFR*. Carcinogenesis, 2008. **29**(7): p. 1367-72.
3. Slyskova, J., et al., *DNA damage and nucleotide excision repair capacity in healthy individuals*. Environ Mol Mutagen, 2011. **52**(7): p. 511-7.
4. Slyskova, J., et al., *Differences in nucleotide excision repair capacity between newly diagnosed colorectal cancer patients and healthy controls*. Mutagenesis, 2012. **27**(2): p. 225-32.
5. Matta, J., et al., *The association of DNA Repair with breast cancer risk in women. A comparative observational study*. BMC Cancer, 2012. **12**: p. 490.
6. Xiong, P., et al., *Sensitivity to benzo(a)pyrene diol-epoxide associated with risk of breast cancer in young women and modulation by glutathione S-transferase polymorphisms: a case-control study*. Cancer Res, 2001. **61**(23): p. 8465-9.
7. Shi, Q., et al., *Reduced DNA repair of benzo[a]pyrene diol epoxide-induced adducts and common XPD polymorphisms in breast cancer patients*. Carcinogenesis, 2004. **25**(9): p. 1695-700.
8. Bau, D.T., et al., *DNA double-strand break repair capacity and risk of breast cancer*. Carcinogenesis, 2007. **28**(8): p. 1726-30.
9. Smith, T.R., et al., *DNA damage and breast cancer risk*. Carcinogenesis, 2003. **24**(5): p. 883-9.
10. Ticha, O., L. Moos, and I. Bekeredjian-Ding, *Effects of long-term cryopreservation of PBMC on recovery of B cell subpopulations*. J Immunol Methods, 2021. **495**: p. 113081.
11. Mallone, R., et al., *Isolation and preservation of peripheral blood mononuclear cells for analysis of islet antigen-reactive T cell responses: position statement of the T-Cell Workshop Committee of the Immunology of Diabetes Society*. Clin Exp Immunol, 2011. **163**(1): p. 33-49.
12. Ramachandran, H., et al., *Optimal thawing of cryopreserved peripheral blood mononuclear cells for use in high-throughput human immune monitoring studies*. Cells, 2012. **1**(3): p. 313-24.
13. Hope, C.M., et al., *Optimization of Blood Handling and Peripheral Blood Mononuclear Cell Cryopreservation of Low Cell Number Samples*. Int J Mol Sci, 2021. **22**(17).
14. Honge, B.L., et al., *Optimizing recovery of frozen human peripheral blood mononuclear cells for flow cytometry*. PLoS One, 2017. **12**(11): p. e0187440.
15. Holland, M., et al., *Separation, banking, and quality control of peripheral blood mononuclear cells from whole blood of melanoma patients*. Cell Tissue Bank, 2018. **19**(4): p. 783-790.
16. Zhu, P., et al., *Detection of tumor-associated cells in cryopreserved peripheral blood mononuclear cell samples for retrospective analysis*. J Transl Med, 2016. **14**(1): p. 198.
17. Weinberg, A., et al., *Optimization and limitations of use of cryopreserved peripheral blood mononuclear cells for functional and phenotypic T-cell characterization*. Clin Vaccine Immunol, 2009. **16**(8): p. 1176-86.
18. Wu, H.C., et al., *DNA repair phenotype and cancer risk: a systematic review and meta-analysis of 55 case-control studies*. Sci Rep, 2022. **12**(1): p. 3405.

19. El-Zein, R.A., et al., *Rapid method for determination of DNA repair capacity in human peripheral blood lymphocytes amongst smokers*. BMC Cancer, 2010. **10**: p. 439.
20. Azqueta, A., et al., *Comet assay to measure DNA repair: approach and applications*. Front Genet, 2014. **5**: p. 288.
21. Collins, A.R. and A. Azqueta, *DNA repair as a biomarker in human biomonitoring studies; further applications of the comet assay*. Mutat Res, 2012. **736**(1-2): p. 122-9.
22. Au, W.W., A.K. Giri, and M. Ruchirawat, *Challenge assay: A functional biomarker for exposure-induced DNA repair deficiency and for risk of cancer*. Int J Hyg Environ Health, 2010. **213**(1): p. 32-9.
23. Valdiglesias, V., et al., *gammaH2AX as a marker of DNA double strand breaks and genomic instability in human population studies*. Mutat Res, 2013. **753**(1): p. 24-40.
24. Redon, C.E., et al., *gamma-H2AX as a biomarker of DNA damage induced by ionizing radiation in human peripheral blood lymphocytes and artificial skin*. Adv Space Res, 2009. **43**(8): p. 1171-1178.
25. Pilch, D.R., et al., *Characteristics of gamma-H2AX foci at DNA double-strand breaks sites*. Biochem Cell Biol, 2003. **81**(3): p. 123-9.
26. Turner, H.C., et al., *Adapting the gamma-H2AX assay for automated processing in human lymphocytes. 1. Technological aspects*. Radiat Res, 2011. **175**(3): p. 282-90.
27. Lee, Y., et al., *Development of a high-throughput gamma-H2AX assay based on imaging flow cytometry*. Radiat Oncol, 2019. **14**(1): p. 150.
28. Kleiner, R.E., et al., *Chemical proteomics reveals a gammaH2AX-53BP1 interaction in the DNA damage response*. Nat Chem Biol, 2015. **11**(10): p. 807-14.
29. Stucki, M., et al., *MDC1 directly binds phosphorylated histone H2AX to regulate cellular responses to DNA double-strand breaks*. Cell, 2005. **123**(7): p. 1213-26.
30. Sharma, P.M., et al., *High throughput measurement of gammaH2AX DSB repair kinetics in a healthy human population*. PLoS One, 2015. **10**(3): p. e0121083.
31. Jeggo, P.A., V. Geuting, and M. Lobrich, *The role of homologous recombination in radiation-induced double-strand break repair*. Radiother Oncol, 2011. **101**(1): p. 7-12.
32. Horn, S., S. Barnard, and K. Rothkamm, *Gamma-H2AX-based dose estimation for whole and partial body radiation exposure*. PLoS One, 2011. **6**(9): p. e25113.
33. Vorobjev, I.A. and N.S. Barteneva, *Quantitative Functional Morphology by Imaging Flow Cytometry*. Methods Mol Biol, 2016. **1389**: p. 3-11.
34. Vorobjev, I.A. and N.S. Barteneva, *Temporal Heterogeneity in Apoptosis Determined by Imaging Flow Cytometry*. Methods Mol Biol, 2016. **1389**: p. 221-33.
35. Han, Y., et al., *Review: imaging technologies for flow cytometry*. Lab Chip, 2016. **16**(24): p. 4639-4647.
36. Nassar, M., et al., *Label-Free Identification of White Blood Cells Using Machine Learning*. Cytometry A, 2019. **95**(8): p. 836-842.
37. Rosenberg, C.A., et al., *Exploring dyserythropoiesis in patients with myelodysplastic syndrome by imaging flow cytometry and machine-learning assisted morphometrics*. Cytometry B Clin Cytom, 2021. **100**(5): p. 554-567.
38. Konieczny, M., et al., *Imaging Flow Cytometry to Study Biofilm-Associated Microbial Aggregates*. Molecules, 2021. **26**(23).
39. Furrer, R., et al., *Remodeling of metabolism and inflammation by exercise ameliorates tumor-associated anemia*. Sci Adv, 2021. **7**(37): p. eabi4852.
40. Terry, M.B., et al., *Cohort Profile: The Breast Cancer Prospective Family Study Cohort (ProF-SC)*. Int J Epidemiol, 2016. **45**(3): p. 683-92.
